# Supplementary material for: Performance of Microarray and Liquid Based Capture Methods for Target Enrichment for Massively Parallel Sequencing and SNP Discovery
Source: PLoS One. 2011 Feb 9;6(2):e16486. doi: 10.1371/journal.pone.0016486 (PMC3036585; doi:10.1371/journal.pone.0016486)
Supplement: Table S2 — Novel SNPs. (XLS) [file pone.16486.s002.xls]

## Sheet: Sheet1
Supplementary table 2. Novel SNPs
Target region	Called SNP	Chromosome	Position	Reference base	Gene	Exon
NA10860 SureSelect
hg18_ct_targetregion_ST3GAL3	K	1	44023380	T	ST3GAL3(ENSG00000126091)
hg18_ct_targetregion_ST3GAL3	R	1	44151446	G	ST3GAL3(ENSG00000126091)
hg18_ct_targetregion_USP36	S	17	74336853	C	USP36(ENSG00000055483)
hg18_ct_targetregion_USP36	R	17	74346613	G	USP36(ENSG00000055483)
hg18_ct_targetregion_CLTCL1	M	22	17570042	C	CLTCL1(ENSG00000070371)
hg18_ct_targetregion_CLTCL1	M	22	17570043	C	CLTCL1(ENSG00000070371)
hg18_ct_targetregion_CLTCL1	A	22	17656340	G	CLTCL1(ENSG00000070371)
hg18_ct_targetregion_SLC9A3R2	Y	16	2025725	C	SLC9A3R2(ENSG00000065054)
hg18_ct_targetregion_SLC22A4	M	5	131659393	C	SLC22A4(ENSG00000197208)
hg18_ct_targetregion_EPS15	M	1	51605032	C	EPS15(ENSG00000085832)
hg18_ct_targetregion_SLC22A18	C	11	2876976	T
hg18_ct_targetregion_SLC22A18	R	11	2892735	G	SLC22A18(ENSG00000110628)
hg18_ct_targetregion_SLC22A18	Y	11	2896524	T	SLC22A18(ENSG00000110628)
hg18_ct_targetregion_SLC22A18	K	11	2897900	G	SLC22A18(ENSG00000110628)
hg18_ct_targetregion_BCR	Y	22	21872199	C	BCR(ENSG00000186716)
hg18_ct_targetregion_BCR	R	22	21878001	A	BCR(ENSG00000186716)
hg18_ct_targetregion_BCR	Y	22	21888365	C	BCR(ENSG00000186716)
hg18_ct_targetregion_BCR	A	22	21934295	G	BCR(ENSG00000186716)
hg18_ct_targetregion_BCR	M	22	21940370	C	BCR(ENSG00000186716)
hg18_ct_targetregion_BCR	Y	22	21969846	T	BCR(ENSG00000186716)
hg18_ct_targetregion_BCR	R	22	21989111	G	BCR(ENSG00000186716)	ENSE00001400303;ENSE00001552617
hg18_ct_targetregion_MTL5	M	11	68244717	C	MTL5(ENSG00000132749)
hg18_ct_targetregion_MTL5	K	11	68258668	T	MTL5(ENSG00000132749)
hg18_ct_targetregion_MTL5	R	11	68262324	G	MTL5(ENSG00000132749)
hg18_ct_targetregion_MTL5	Y	11	68262738	C	MTL5(ENSG00000132749)
hg18_ct_targetregion_MTL5	S	11	68275702	G
hg18_ct_targetregion_P2RX7	M	12	120079435	C	P2RX7(ENSG00000089041)
hg18_ct_targetregion_KIAA1804	Y	1	231561539	T	MAP3K19(ENSG00000143674)
hg18_ct_targetregion_CNDP2	R	18	70317815	A	CNDP2(ENSG00000133313)
hg18_ct_targetregion_SLC12A7	A	5	1136255	G	SLC12A7(ENSG00000113504)
hg18_ct_targetregion_SLC12A7	Y	5	1146340	C	SLC12A7(ENSG00000113504)
hg18_ct_targetregion_SLC12A7	S	5	1150654	C	SLC12A7(ENSG00000113504)
hg18_ct_targetregion_SLC12A7	S	5	1151278	C	SLC12A7(ENSG00000113504)
hg18_ct_targetregion_SLC12A7	T	5	1151405	A	SLC12A7(ENSG00000113504)
hg18_ct_targetregion_SLC12A7	M	5	1152688	C	SLC12A7(ENSG00000113504)
hg18_ct_targetregion_SLC12A7	Y	5	1153337	C	SLC12A7(ENSG00000113504)
hg18_ct_targetregion_SLC12A7	R	5	1153545	G	SLC12A7(ENSG00000113504)
hg18_ct_targetregion_SLC12A7	Y	5	1156376	C	SLC12A7(ENSG00000113504)
hg18_ct_targetregion_SLC12A7	Y	5	1157591	T	SLC12A7(ENSG00000113504)
hg18_ct_targetregion_SLC12A7	R	5	1158971	G	SLC12A7(ENSG00000113504)
hg18_ct_targetregion_SLC12A7	Y	5	1159217	T	SLC12A7(ENSG00000113504)
hg18_ct_targetregion_SLC12A7	Y	5	1160346	C	SLC12A7(ENSG00000113504)
hg18_ct_targetregion_SLC12A7	M	5	1165994	C
hg18_ct_targetregion_C22orf8	Y	22	44121176	C	SMC1B(ENSG00000077935)
hg18_ct_targetregion_ATP10A	A	15	23470677	T
hg18_ct_targetregion_ATP10A	M	15	23472549	C
hg18_ct_targetregion_ATP10A	R	15	23537490	G	ATP10A(ENSG00000206190)
hg18_ct_targetregion_ATP10A	R	15	23559616	G	ATP10A(ENSG00000206190)
hg18_ct_targetregion_ATP10A	R	15	23599434	G	ATP10A(ENSG00000206190)
hg18_ct_targetregion_ATP10A	M	15	23617651	C	ATP10A(ENSG00000206190)
hg18_ct_targetregion_IRAK1	C	X	152942347	T	MECP2(ENSG00000169057)	ENSE00001451349;ENSE00001252086
hg18_ct_targetregion_SERPINF1	R	17	1612958	G	SERPINF1(ENSG00000132386)
hg18_ct_targetregion_SERPINF1	M	17	1617249	A	SERPINF1(ENSG00000132386)
hg18_ct_targetregion_TMEM8	M	16	362827	C	TMEM8(ENSG00000129925)
hg18_ct_targetregion_NT5E	K	6	86217675	G	NT5E(ENSG00000135318)
hg18_ct_targetregion_NT5E	M	6	86224529	C	NT5E(ENSG00000135318)
hg18_ct_targetregion_ATP6V1C2	R	2	10821244	G	ATP6V1C2(ENSG00000143882)
hg18_ct_targetregion_ATP6V1C2	R	2	10835914	G	ATP6V1C2(ENSG00000143882)
hg18_ct_targetregion_BTN3A3	R	6	26547876	A
hg18_ct_targetregion_NID2	K	14	51539114	T	C14orf166(ENSG00000087302)
hg18_ct_targetregion_NID2	R	14	51556050	G	NID2(ENSG00000087303)
hg18_ct_targetregion_SLC15A2	A	3	123111803	G	SLC15A2(ENSG00000163406)
hg18_ct_targetregion_LLGL2	Y	17	71043407	C	LLGL2(ENSG00000073350)
hg18_ct_targetregion_LLGL2	Y	17	71052260	C	LLGL2(ENSG00000073350)
hg18_ct_targetregion_LLGL2	Y	17	71057019	C	LLGL2(ENSG00000073350)
hg18_ct_targetregion_LLGL2	W	17	71077478	A	LLGL2(ENSG00000073350)
hg18_ct_targetregion_LLGL2	M	17	71077479	A	LLGL2(ENSG00000073350)
hg18_ct_targetregion_ITIH4	M	3	52843765	A	MUSTN1(ENSG00000213533)
hg18_ct_targetregion_WDR60	Y	7	158392870	T	WDR60(ENSG00000126870)
hg18_ct_targetregion_WDR60	S	7	158395383	C	WDR60(ENSG00000126870)
hg18_ct_targetregion_WDR60	Y	7	158411071	T	WDR60(ENSG00000126870)
hg18_ct_targetregion_OAS1	K	12	111838656	G	OAS1(ENSG00000089127)
hg18_ct_targetregion_CPNE1	R	20	33680480	G	CPNE1(ENSG00000214078)
hg18_ct_targetregion_TRAP1	K	16	3666376	G	TRAP1(ENSG00000126602)
hg18_ct_targetregion_FANCA	Y	16	88340083	C	FANCA(ENSG00000187741)
hg18_ct_targetregion_GBP3	R	1	89246997	A	GBP3(ENSG00000117226)
hg18_ct_targetregion_TNXB	Y	6	32162770	C	TNXB(ENSG00000168477)
hg18_ct_targetregion_PECAM1	R	17	59775176	A	PECAM1(ENSG00000198802)
hg18_ct_targetregion_PECAM1	Y	17	59793376	C	PECAM1(ENSG00000198802)
hg18_ct_targetregion_BDH2	Y	4	104238943	C	BDH2(ENSG00000164039)
NA10860 Nimblegen
hg18_ct_targetregion_ST3GAL3	R	1	43970521	G	ST3GAL3(ENSG00000126091)
hg18_ct_targetregion_ST3GAL3	M	1	43996432	A	ST3GAL3(ENSG00000126091)
hg18_ct_targetregion_ST3GAL3	Y	1	44004044	C	ST3GAL3(ENSG00000126091)
hg18_ct_targetregion_ST3GAL3	M	1	44072312	C	ST3GAL3(ENSG00000126091)
hg18_ct_targetregion_ST3GAL3	R	1	44151446	G	ST3GAL3(ENSG00000126091)
hg18_ct_targetregion_USP36	M	17	74295629	C
hg18_ct_targetregion_USP36	R	17	74346613	G	USP36(ENSG00000055483)
hg18_ct_targetregion_CLTCL1	M	22	17570042	C	CLTCL1(ENSG00000070371)
hg18_ct_targetregion_CLTCL1	M	22	17570043	C	CLTCL1(ENSG00000070371)
hg18_ct_targetregion_CLTCL1	Y	22	17570977	C	CLTCL1(ENSG00000070371)
hg18_ct_targetregion_CLTCL1	M	22	17595625	A	CLTCL1(ENSG00000070371)
hg18_ct_targetregion_CLTCL1	C	22	17604579	A	CLTCL1(ENSG00000070371)
hg18_ct_targetregion_CLTCL1	A	22	17656340	G	CLTCL1(ENSG00000070371)
hg18_ct_targetregion_TRIM45	Y	1	117453655	C
hg18_ct_targetregion_SLC9A3R2	S	16	2016932	C	SLC9A3R2(ENSG00000065054)	ENSE00000873722
hg18_ct_targetregion_SLC9A3R2	Y	16	2025725	C	SLC9A3R2(ENSG00000065054)
hg18_ct_targetregion_SLC9A3R2	Y	16	2028418	T	SLC9A3R2(ENSG00000065054)	ENSE00000945916
hg18_ct_targetregion_EPS15	M	1	51605032	C	EPS15(ENSG00000085832)
hg18_ct_targetregion_EPS15	C	1	51663212	A	EPS15(ENSG00000085832)
hg18_ct_targetregion_EPS15	M	1	51682367	A	EPS15(ENSG00000085832)
hg18_ct_targetregion_EPS15	R	1	51700190	A	EPS15(ENSG00000085832)
hg18_ct_targetregion_EPS15	C	1	51708082	A	EPS15(ENSG00000085832)
hg18_ct_targetregion_EPS15	K	1	51740023	G	EPS15(ENSG00000085832)
hg18_ct_targetregion_EPS15	C	1	51758137	A
hg18_ct_targetregion_SLC22A18	S	11	2882909	G	SLC22A18(ENSG00000110628)
hg18_ct_targetregion_SLC22A18	R	11	2883221	G	SLC22A18(ENSG00000110628)
hg18_ct_targetregion_SLC22A18	R	11	2892735	G	SLC22A18(ENSG00000110628)
hg18_ct_targetregion_SLC22A18	M	11	2901942	A	SLC22A18(ENSG00000110628)
hg18_ct_targetregion_BCR	Y	22	21860966	T	BCR(ENSG00000186716)
hg18_ct_targetregion_BCR	R	22	21878001	A	BCR(ENSG00000186716)
hg18_ct_targetregion_BCR	Y	22	21888365	C	BCR(ENSG00000186716)
hg18_ct_targetregion_BCR	A	22	21934295	G	BCR(ENSG00000186716)
hg18_ct_targetregion_BCR	M	22	21940370	C	BCR(ENSG00000186716)
hg18_ct_targetregion_BCR	M	22	21966538	A	BCR(ENSG00000186716)
hg18_ct_targetregion_BCR	Y	22	21969846	T	BCR(ENSG00000186716)
hg18_ct_targetregion_MTL5	M	11	68244717	C	MTL5(ENSG00000132749)
hg18_ct_targetregion_MTL5	C	11	68257952	A	MTL5(ENSG00000132749)
hg18_ct_targetregion_MTL5	K	11	68258668	T	MTL5(ENSG00000132749)
hg18_ct_targetregion_MTL5	R	11	68262324	G	MTL5(ENSG00000132749)
hg18_ct_targetregion_MTL5	Y	11	68262738	C	MTL5(ENSG00000132749)
hg18_ct_targetregion_MTL5	S	11	68275702	G
hg18_ct_targetregion_P2RX7	M	12	120079435	C	P2RX7(ENSG00000089041)
hg18_ct_targetregion_KIAA1804	R	1	231546092	A	MAP3K19(ENSG00000143674)
hg18_ct_targetregion_KIAA1804	Y	1	231561539	T	MAP3K19(ENSG00000143674)
hg18_ct_targetregion_CNDP2	M	18	70317153	A	CNDP2(ENSG00000133313)
hg18_ct_targetregion_CNDP2	M	18	70317154	A	CNDP2(ENSG00000133313)
hg18_ct_targetregion_CNDP2	R	18	70317815	A	CNDP2(ENSG00000133313)
hg18_ct_targetregion_FAM48A	R	13	36530731	G	FAM48A(ENSG00000102710)
hg18_ct_targetregion_CCDC15	T	11	124326418	A
hg18_ct_targetregion_CCDC15	Y	11	124398952	C	CCDC15(ENSG00000149548)
hg18_ct_targetregion_SLC12A7	R	5	1100750	A
hg18_ct_targetregion_SLC12A7	R	5	1105737	A	SLC12A7(ENSG00000113504)
hg18_ct_targetregion_SLC12A7	C	5	1113839	A	SLC12A7(ENSG00000113504)
hg18_ct_targetregion_SLC12A7	A	5	1136255	G	SLC12A7(ENSG00000113504)
hg18_ct_targetregion_SLC12A7	Y	5	1149373	C	SLC12A7(ENSG00000113504)
hg18_ct_targetregion_SLC12A7	R	5	1150367	G	SLC12A7(ENSG00000113504)
hg18_ct_targetregion_SLC12A7	S	5	1150654	C	SLC12A7(ENSG00000113504)
hg18_ct_targetregion_SLC12A7	M	5	1152688	C	SLC12A7(ENSG00000113504)
hg18_ct_targetregion_SLC12A7	Y	5	1153337	C	SLC12A7(ENSG00000113504)
hg18_ct_targetregion_SLC12A7	R	5	1153545	G	SLC12A7(ENSG00000113504)
hg18_ct_targetregion_SLC12A7	R	5	1154817	G	SLC12A7(ENSG00000113504)
hg18_ct_targetregion_SLC12A7	Y	5	1156376	C	SLC12A7(ENSG00000113504)
hg18_ct_targetregion_SLC12A7	M	5	1156404	A	SLC12A7(ENSG00000113504)
hg18_ct_targetregion_SLC12A7	Y	5	1157591	T	SLC12A7(ENSG00000113504)
hg18_ct_targetregion_SLC12A7	R	5	1158971	G	SLC12A7(ENSG00000113504)
hg18_ct_targetregion_SLC12A7	Y	5	1159217	T	SLC12A7(ENSG00000113504)
hg18_ct_targetregion_SLC12A7	Y	5	1160346	C	SLC12A7(ENSG00000113504)
hg18_ct_targetregion_SLC12A7	A	5	1165994	C
hg18_ct_targetregion_FLVCR	Y	1	211118731	C	FLVCR1(ENSG00000162769)
hg18_ct_targetregion_C22orf8	C	22	44092201	A	FAM118A(ENSG00000100376)
hg18_ct_targetregion_C22orf8	M	22	44118954	A	SMC1B(ENSG00000077935)	ENSE00001427689
hg18_ct_targetregion_C22orf8	Y	22	44121176	C	SMC1B(ENSG00000077935)
hg18_ct_targetregion_ATP10A	M	15	23472549	C
hg18_ct_targetregion_ATP10A	A	15	23507268	T	ATP10A(ENSG00000206190)
hg18_ct_targetregion_ATP10A	M	15	23516071	A	ATP10A(ENSG00000206190)
hg18_ct_targetregion_ATP10A	R	15	23537490	G	ATP10A(ENSG00000206190)
hg18_ct_targetregion_ATP10A	M	15	23549461	C	ATP10A(ENSG00000206190)
hg18_ct_targetregion_ATP10A	R	15	23559616	G	ATP10A(ENSG00000206190)
hg18_ct_targetregion_ATP10A	M	15	23613220	A	ATP10A(ENSG00000206190)
hg18_ct_targetregion_ATP10A	A	15	23630774	G	ATP10A(ENSG00000206190)
hg18_ct_targetregion_ATP10A	M	15	23640216	A	ATP10A(ENSG00000206190)
hg18_ct_targetregion_IRAK1	C	X	152942347	T	MECP2(ENSG00000169057)	ENSE00001451349;ENSE00001252086
hg18_ct_targetregion_SERPINF1	R	17	1612958	G	SERPINF1(ENSG00000132386)
hg18_ct_targetregion_SERPINF1	M	17	1617249	A	SERPINF1(ENSG00000132386)
hg18_ct_targetregion_SERPINF1	S	17	1625682	G	SERPINF1(ENSG00000132386)
hg18_ct_targetregion_TMEM8	S	16	358878	G	MRPL28(ENSG00000086504)
hg18_ct_targetregion_TMEM8	M	16	362827	C	TMEM8(ENSG00000129925)
hg18_ct_targetregion_TMEM8	C	16	374466	A
hg18_ct_targetregion_TMEM8	M	16	376861	A	Z97634.3(ENSG00000216963)	ENSE00001557985
hg18_ct_targetregion_THUMPD3	Y	3	9375328	T
hg18_ct_targetregion_ATP6V1C2	R	2	10821244	G	ATP6V1C2(ENSG00000143882)
hg18_ct_targetregion_ATP6V1C2	M	2	10824001	A	ATP6V1C2(ENSG00000143882)
hg18_ct_targetregion_ATP6V1C2	M	2	10833177	C	ATP6V1C2(ENSG00000143882)
hg18_ct_targetregion_ATP6V1C2	R	2	10835914	G	ATP6V1C2(ENSG00000143882)
hg18_ct_targetregion_BTN3A3	A	6	26562759	G
hg18_ct_targetregion_NID2	R	14	51556050	G	NID2(ENSG00000087303)
hg18_ct_targetregion_SPATA20	Y	17	45976418	C
hg18_ct_targetregion_SPATA20	Y	17	45977263	T
hg18_ct_targetregion_SPATA20	Y	17	45977264	C
hg18_ct_targetregion_SLC15A2	R	3	123111803	G	SLC15A2(ENSG00000163406)
hg18_ct_targetregion_LOC85865	C	7	89820604	A	GTPBP10(ENSG00000105793)
hg18_ct_targetregion_LLGL2	Y	17	71043407	C	LLGL2(ENSG00000073350)
hg18_ct_targetregion_LLGL2	Y	17	71052260	C	LLGL2(ENSG00000073350)
hg18_ct_targetregion_LLGL2	Y	17	71057019	C	LLGL2(ENSG00000073350)
hg18_ct_targetregion_LLGL2	Y	17	71086700	T
hg18_ct_targetregion_DNAJC15	T	13	42496796	G	DNAJC15(ENSG00000120675)
hg18_ct_targetregion_DNAJC15	M	13	42548142	A	DNAJC15(ENSG00000120675)
hg18_ct_targetregion_DNAJC15	M	13	42561025	C	DNAJC15(ENSG00000120675)
hg18_ct_targetregion_DNAJC15	K	13	42561719	G	DNAJC15(ENSG00000120675)
hg18_ct_targetregion_ITIH4	C	3	52828937	A	ITIH4(ENSG00000055955)
hg18_ct_targetregion_WDR60	Y	7	158392870	T	WDR60(ENSG00000126870)
hg18_ct_targetregion_WDR60	S	7	158395383	C	WDR60(ENSG00000126870)
hg18_ct_targetregion_WDR60	C	7	158397554	A	WDR60(ENSG00000126870)
hg18_ct_targetregion_WDR60	Y	7	158411071	T	WDR60(ENSG00000126870)
hg18_ct_targetregion_OAS1	M	12	111843901	A	OAS1(ENSG00000089127)
hg18_ct_targetregion_CPNE1	Y	20	33686457	C	CPNE1(ENSG00000214078)
hg18_ct_targetregion_TRAP1	M	16	3647837	A	DNASE1(ENSG00000213918)
hg18_ct_targetregion_TRAP1	R	16	3687097	G	TRAP1(ENSG00000126602)
hg18_ct_targetregion_TRAP1	M	16	3695408	A	TRAP1(ENSG00000126602)
hg18_ct_targetregion_FANCA	Y	16	88353500	T	FANCA(ENSG00000187741)
hg18_ct_targetregion_GBP3	R	1	89246997	A	GBP3(ENSG00000117226)
hg18_ct_targetregion_GBP3	C	1	89255711	A	GBP3(ENSG00000117226)
hg18_ct_targetregion_TNXB	M	6	32137016	A	TNXB(ENSG00000168477)
hg18_ct_targetregion_TNXB	Y	6	32162770	C	TNXB(ENSG00000168477)
hg18_ct_targetregion_TNXB	M	6	32167343	C	TNXB(ENSG00000168477)
hg18_ct_targetregion_PECAM1	M	17	59757401	A	PECAM1(ENSG00000198802)
hg18_ct_targetregion_PECAM1	R	17	59775176	A	PECAM1(ENSG00000198802)
hg18_ct_targetregion_PECAM1	M	17	59793131	A	PECAM1(ENSG00000198802)
hg18_ct_targetregion_PECAM1	Y	17	59793376	C	PECAM1(ENSG00000198802)
hg18_ct_targetregion_PECAM1	Y	17	59808124	T
hg18_ct_targetregion_BDH2	Y	4	104238943	C	BDH2(ENSG00000164039)
NA11992 SureSelect
hg18_ct_targetregion_USP36	S	17	74336853	C	USP36(ENSG00000055483)
hg18_ct_targetregion_CLTCL1	R	22	17656340	G	CLTCL1(ENSG00000070371)
hg18_ct_targetregion_SLC9A3R2	R	16	2017310	G	SLC9A3R2(ENSG00000065054)
hg18_ct_targetregion_SLC9A3R2	R	16	2032615	G	NTHL1(ENSG00000065057)
hg18_ct_targetregion_EPS15	M	1	51605032	C	EPS15(ENSG00000085832)
hg18_ct_targetregion_SLC22A18	Y	11	2892456	C	SLC22A18(ENSG00000110628)
hg18_ct_targetregion_SLC22A18	T	11	2897900	G	SLC22A18(ENSG00000110628)
hg18_ct_targetregion_BCR	R	22	21878001	A	BCR(ENSG00000186716)
hg18_ct_targetregion_BCR	M	22	21879638	C	BCR(ENSG00000186716)
hg18_ct_targetregion_BCR	Y	22	21888365	C	BCR(ENSG00000186716)
hg18_ct_targetregion_BCR	W	22	21897145	T	BCR(ENSG00000186716)
hg18_ct_targetregion_BCR	Y	22	21927975	C	BCR(ENSG00000186716)
hg18_ct_targetregion_BCR	Y	22	21928009	C	BCR(ENSG00000186716)
hg18_ct_targetregion_BCR	K	22	21986148	T	BCR(ENSG00000186716)
hg18_ct_targetregion_BCR	Y	22	21987431	C	BCR(ENSG00000186716)
hg18_ct_targetregion_BCR	M	22	21991565	A
hg18_ct_targetregion_BCR	R	22	21991795	G
hg18_ct_targetregion_BCR	M	22	21991823	A
hg18_ct_targetregion_BCR	K	22	21992243	G
hg18_ct_targetregion_MTL5	M	11	68244717	C	MTL5(ENSG00000132749)
hg18_ct_targetregion_MTL5	R	11	68262324	G	MTL5(ENSG00000132749)
hg18_ct_targetregion_MTL5	Y	11	68262738	C	MTL5(ENSG00000132749)
hg18_ct_targetregion_KIAA1804	R	1	231546092	A	MAP3K19(ENSG00000143674)
hg18_ct_targetregion_CNDP2	R	18	70317815	A	CNDP2(ENSG00000133313)
hg18_ct_targetregion_FAM48A	R	13	36530731	G	FAM48A(ENSG00000102710)
hg18_ct_targetregion_SLC12A7	M	5	1116925	C	SLC12A7(ENSG00000113504)
hg18_ct_targetregion_SLC12A7	Y	5	1117453	C	SLC12A7(ENSG00000113504)
hg18_ct_targetregion_SLC12A7	A	5	1136255	G	SLC12A7(ENSG00000113504)
hg18_ct_targetregion_SLC12A7	M	5	1139472	C	SLC12A7(ENSG00000113504)
hg18_ct_targetregion_SLC12A7	A	5	1165994	C
hg18_ct_targetregion_ATP10A	R	15	23537490	G	ATP10A(ENSG00000206190)
hg18_ct_targetregion_ATP10A	R	15	23559616	G	ATP10A(ENSG00000206190)
hg18_ct_targetregion_ATP10A	R	15	23599434	G	ATP10A(ENSG00000206190)
hg18_ct_targetregion_ATP10A	M	15	23606608	C	ATP10A(ENSG00000206190)
hg18_ct_targetregion_ATP10A	M	15	23606990	C	ATP10A(ENSG00000206190)
hg18_ct_targetregion_ATP10A	M	15	23660781	C	ATP10A(ENSG00000206190)
hg18_ct_targetregion_SERPINF1	R	17	1612958	G	SERPINF1(ENSG00000132386)
hg18_ct_targetregion_SERPINF1	Y	17	1616087	C	SERPINF1(ENSG00000132386)
hg18_ct_targetregion_SERPINF1	M	17	1617249	A	SERPINF1(ENSG00000132386)
hg18_ct_targetregion_TMEM8	C	16	368517	T	TMEM8(ENSG00000129925)
hg18_ct_targetregion_TMEM8	R	16	373278	A
hg18_ct_targetregion_NT5E	R	6	86241530	A	NT5E(ENSG00000135318)
hg18_ct_targetregion_ATP6V1C2	R	2	10821244	G	ATP6V1C2(ENSG00000143882)
hg18_ct_targetregion_ATP6V1C2	Y	2	10834333	C	ATP6V1C2(ENSG00000143882)
hg18_ct_targetregion_BTN3A3	R	6	26547876	A
hg18_ct_targetregion_DPM2	W	9	129736306	A
hg18_ct_targetregion_NID2	R	14	51548864	G	NID2(ENSG00000087303)
hg18_ct_targetregion_NID2	R	14	51556050	G	NID2(ENSG00000087303)
hg18_ct_targetregion_SPATA20	Y	17	45976418	C
hg18_ct_targetregion_LLGL2	Y	17	71043407	C	LLGL2(ENSG00000073350)
hg18_ct_targetregion_LLGL2	S	17	71068110	C	LLGL2(ENSG00000073350)
hg18_ct_targetregion_DNAJC15	Y	13	42541885	T	DNAJC15(ENSG00000120675)
hg18_ct_targetregion_DNAJC15	K	13	42578724	T	DNAJC15(ENSG00000120675)
hg18_ct_targetregion_DNAJC15	R	13	42578725	G	DNAJC15(ENSG00000120675)
hg18_ct_targetregion_WDR60	Y	7	158355342	C	WDR60(ENSG00000126870)	ENSE00001527472;ENSE00001250615
hg18_ct_targetregion_WDR60	Y	7	158392870	T	WDR60(ENSG00000126870)
hg18_ct_targetregion_WDR60	S	7	158395383	C	WDR60(ENSG00000126870)
hg18_ct_targetregion_WDR60	Y	7	158411071	T	WDR60(ENSG00000126870)
hg18_ct_targetregion_CPNE1	R	20	33680480	G	CPNE1(ENSG00000214078)
hg18_ct_targetregion_TRAP1	R	16	3669842	G	TRAP1(ENSG00000126602)
hg18_ct_targetregion_FANCA	R	16	88376606	G	FANCA(ENSG00000187741)
hg18_ct_targetregion_FANCA	S	16	88383849	G	FANCA(ENSG00000187741)
hg18_ct_targetregion_TNXB	Y	6	32162770	C	TNXB(ENSG00000168477)
hg18_ct_targetregion_TNXB	S	6	32164685	G	TNXB(ENSG00000168477)	ENSE00001432563;ENSE00001060956
hg18_ct_targetregion_TNXB	M	6	32174014	A	TNXB(ENSG00000168477)
hg18_ct_targetregion_PECAM1	R	17	59775176	A	PECAM1(ENSG00000198802)
hg18_ct_targetregion_BDH2	Y	4	104238943	C	BDH2(ENSG00000164039)
NA11992 Nimblegen
hg18_ct_targetregion_ST3GAL3	M	1	44032700	C	ST3GAL3(ENSG00000126091)
hg18_ct_targetregion_ST3GAL3	W	1	44032701	T	ST3GAL3(ENSG00000126091)
hg18_ct_targetregion_ST3GAL3	C	1	44049142	G	ST3GAL3(ENSG00000126091)
hg18_ct_targetregion_ST3GAL3	M	1	44125314	C	ST3GAL3(ENSG00000126091)
hg18_ct_targetregion_USP36	S	17	74336853	C	USP36(ENSG00000055483)
hg18_ct_targetregion_CLTCL1	M	22	17593705	A	CLTCL1(ENSG00000070371)
hg18_ct_targetregion_CLTCL1	M	22	17597389	A	CLTCL1(ENSG00000070371)	ENSE00000596271
hg18_ct_targetregion_CLTCL1	M	22	17597390	A	CLTCL1(ENSG00000070371)	ENSE00000596271
hg18_ct_targetregion_CLTCL1	R	22	17656340	G	CLTCL1(ENSG00000070371)
hg18_ct_targetregion_SLC22A18	Y	11	2892456	C	SLC22A18(ENSG00000110628)
hg18_ct_targetregion_SLC22A18	R	11	2892735	G	SLC22A18(ENSG00000110628)
hg18_ct_targetregion_BCR	R	22	21878001	A	BCR(ENSG00000186716)
hg18_ct_targetregion_BCR	Y	22	21888365	C	BCR(ENSG00000186716)
hg18_ct_targetregion_BCR	W	22	21897145	T	BCR(ENSG00000186716)
hg18_ct_targetregion_BCR	Y	22	21927975	C	BCR(ENSG00000186716)
hg18_ct_targetregion_BCR	Y	22	21928009	C	BCR(ENSG00000186716)
hg18_ct_targetregion_MTL5	M	11	68244717	C	MTL5(ENSG00000132749)
hg18_ct_targetregion_MTL5	C	11	68246724	A	MTL5(ENSG00000132749)
hg18_ct_targetregion_MTL5	R	11	68262324	G	MTL5(ENSG00000132749)
hg18_ct_targetregion_MTL5	Y	11	68262738	C	MTL5(ENSG00000132749)
hg18_ct_targetregion_P2RX7	M	12	120051275	A
hg18_ct_targetregion_P2RX7	M	12	120054969	A
hg18_ct_targetregion_P2RX7	M	12	120068008	C	P2RX7(ENSG00000089041)
hg18_ct_targetregion_P2RX7	R	12	120103356	G	P2RX7(ENSG00000089041)
hg18_ct_targetregion_KIAA1804	R	1	231546092	A	MAP3K19(ENSG00000143674)
hg18_ct_targetregion_CNDP2	R	18	70317815	A	CNDP2(ENSG00000133313)
hg18_ct_targetregion_FAM48A	S	13	36486784	G	FAM48A(ENSG00000102710)
hg18_ct_targetregion_CCDC15	Y	11	124398952	C	CCDC15(ENSG00000149548)
hg18_ct_targetregion_SLC12A7	K	5	1100459	G
hg18_ct_targetregion_SLC12A7	K	5	1100478	G
hg18_ct_targetregion_SLC12A7	R	5	1100515	G
hg18_ct_targetregion_SLC12A7	R	5	1100519	A
hg18_ct_targetregion_SLC12A7	R	5	1101675	A
hg18_ct_targetregion_SLC12A7	R	5	1101679	G
hg18_ct_targetregion_SLC12A7	M	5	1108127	A	SLC12A7(ENSG00000113504)
hg18_ct_targetregion_SLC12A7	C	5	1113839	A	SLC12A7(ENSG00000113504)
hg18_ct_targetregion_SLC12A7	Y	5	1117453	C	SLC12A7(ENSG00000113504)
hg18_ct_targetregion_SLC12A7	M	5	1126614	A	SLC12A7(ENSG00000113504)
hg18_ct_targetregion_SLC12A7	S	5	1130181	G	SLC12A7(ENSG00000113504)
hg18_ct_targetregion_SLC12A7	M	5	1139472	C	SLC12A7(ENSG00000113504)
hg18_ct_targetregion_SLC12A7	C	5	1154608	G	SLC12A7(ENSG00000113504)
hg18_ct_targetregion_SLC12A7	C	5	1154609	A	SLC12A7(ENSG00000113504)
hg18_ct_targetregion_SLC12A7	M	5	1165994	C
hg18_ct_targetregion_ZNF419	G	19	62702748	A
hg18_ct_targetregion_ATP10A	Y	15	23473533	T
hg18_ct_targetregion_ATP10A	R	15	23537490	G	ATP10A(ENSG00000206190)
hg18_ct_targetregion_ATP10A	M	15	23539157	A	ATP10A(ENSG00000206190)
hg18_ct_targetregion_ATP10A	M	15	23574160	C	ATP10A(ENSG00000206190)
hg18_ct_targetregion_ATP10A	R	15	23599434	G	ATP10A(ENSG00000206190)
hg18_ct_targetregion_ATP10A	M	15	23606608	C	ATP10A(ENSG00000206190)
hg18_ct_targetregion_ATP10A	M	15	23606990	C	ATP10A(ENSG00000206190)
hg18_ct_targetregion_ATP10A	M	15	23658247	A	ATP10A(ENSG00000206190)
hg18_ct_targetregion_ATP10A	M	15	23660781	C	ATP10A(ENSG00000206190)
hg18_ct_targetregion_SERPINF1	Y	17	1616087	C	SERPINF1(ENSG00000132386)
hg18_ct_targetregion_SERPINF1	M	17	1617249	A	SERPINF1(ENSG00000132386)
hg18_ct_targetregion_SERPINF1	S	17	1625682	G	SERPINF1(ENSG00000132386)
hg18_ct_targetregion_NT5E	R	6	86241530	A	NT5E(ENSG00000135318)
hg18_ct_targetregion_ATP6V1C2	R	2	10821244	G	ATP6V1C2(ENSG00000143882)
hg18_ct_targetregion_ATP6V1C2	T	2	10834333	C	ATP6V1C2(ENSG00000143882)
hg18_ct_targetregion_ATP6V1C2	R	2	10846841	A	PDIA6(ENSG00000143870)
hg18_ct_targetregion_ATP6V1C2	Y	2	10846842	C	PDIA6(ENSG00000143870)
hg18_ct_targetregion_BTN3A3	R	6	26547876	A
hg18_ct_targetregion_NID2	R	14	51556050	G	NID2(ENSG00000087303)
hg18_ct_targetregion_LLGL2	M	17	71042917	A	LLGL2(ENSG00000073350)
hg18_ct_targetregion_LLGL2	Y	17	71043407	C	LLGL2(ENSG00000073350)
hg18_ct_targetregion_LLGL2	Y	17	71052260	C	LLGL2(ENSG00000073350)
hg18_ct_targetregion_LLGL2	C	17	71055944	T	LLGL2(ENSG00000073350)
hg18_ct_targetregion_DNAJC15	K	13	42498815	G	DNAJC15(ENSG00000120675)
hg18_ct_targetregion_DNAJC15	Y	13	42541885	T	DNAJC15(ENSG00000120675)
hg18_ct_targetregion_DNAJC15	K	13	42561719	G	DNAJC15(ENSG00000120675)
hg18_ct_targetregion_WDR60	S	7	158349165	G	WDR60(ENSG00000126870)
hg18_ct_targetregion_WDR60	M	7	158370545	A	WDR60(ENSG00000126870)
hg18_ct_targetregion_WDR60	S	7	158395383	C	WDR60(ENSG00000126870)
hg18_ct_targetregion_WDR60	Y	7	158411071	T	WDR60(ENSG00000126870)
hg18_ct_targetregion_CPNE1	M	20	33678589	A	CPNE1(ENSG00000214078)
hg18_ct_targetregion_TRAP1	R	16	3666726	G	TRAP1(ENSG00000126602)
hg18_ct_targetregion_TRAP1	R	16	3669842	G	TRAP1(ENSG00000126602)
hg18_ct_targetregion_TRAP1	R	16	3685897	G	TRAP1(ENSG00000126602)
hg18_ct_targetregion_TRAP1	M	16	3695408	A	TRAP1(ENSG00000126602)
hg18_ct_targetregion_TRAP1	R	16	3705749	G	TRAP1(ENSG00000126602)
hg18_ct_targetregion_FANCA	Y	16	88353500	T	FANCA(ENSG00000187741)
hg18_ct_targetregion_FANCA	R	16	88376606	G	FANCA(ENSG00000187741)
hg18_ct_targetregion_FANCA	S	16	88383849	G	FANCA(ENSG00000187741)
hg18_ct_targetregion_GBP3	R	1	89250638	A	GBP3(ENSG00000117226)
hg18_ct_targetregion_TNXB	M	6	32137016	A	TNXB(ENSG00000168477)
hg18_ct_targetregion_TNXB	Y	6	32162770	C	TNXB(ENSG00000168477)
hg18_ct_targetregion_TNXB	M	6	32166649	A	TNXB(ENSG00000168477)
hg18_ct_targetregion_TNXB	M	6	32174014	A	TNXB(ENSG00000168477)
hg18_ct_targetregion_PECAM1	R	17	59775176	A	PECAM1(ENSG00000198802)
hg18_ct_targetregion_PECAM1	C	17	59790519	A	PECAM1(ENSG00000198802)
hg18_ct_targetregion_BDH2	M	4	104224599	C	BDH2(ENSG00000164039)
hg18_ct_targetregion_BDH2	Y	4	104238943	C	BDH2(ENSG00000164039)
NA11993 SureSelect
hg18_ct_targetregion_ST3GAL3	R	1	43944758	G
hg18_ct_targetregion_ST3GAL3	Y	1	44004044	C	ST3GAL3(ENSG00000126091)
hg18_ct_targetregion_ST3GAL3	S	1	44031272	C	ST3GAL3(ENSG00000126091)
hg18_ct_targetregion_ST3GAL3	S	1	44106864	G	ST3GAL3(ENSG00000126091)
hg18_ct_targetregion_ST3GAL3	R	1	44110609	G	ST3GAL3(ENSG00000126091)
hg18_ct_targetregion_ST3GAL3	Y	1	44173812	T	ARTN(ENSG00000117407)	ENSE00001457603
hg18_ct_targetregion_USP36	Y	17	74291151	T
hg18_ct_targetregion_USP36	R	17	74291561	G
hg18_ct_targetregion_USP36	R	17	74328144	G	USP36(ENSG00000055483)
hg18_ct_targetregion_USP36	R	17	74346613	G	USP36(ENSG00000055483)
hg18_ct_targetregion_CLEC10A	Y	17	6920653	C	CLEC10A(ENSG00000132514)
hg18_ct_targetregion_CLTCL1	R	22	17639784	G	CLTCL1(ENSG00000070371)
hg18_ct_targetregion_CLTCL1	R	22	17656340	G	CLTCL1(ENSG00000070371)
hg18_ct_targetregion_CLTCL1	K	22	17659957	T
hg18_ct_targetregion_TRIM45	R	1	117464691	G	TRIM45(ENSG00000134253)
hg18_ct_targetregion_TRIM45	Y	1	117468107	C
hg18_ct_targetregion_SLC9A3R2	Y	16	2025725	C	SLC9A3R2(ENSG00000065054)
hg18_ct_targetregion_SLC9A3R2	Y	16	2028418	T	SLC9A3R2(ENSG00000065054)	ENSE00000945916
hg18_ct_targetregion_SLC22A4	M	5	131659393	C	SLC22A4(ENSG00000197208)
hg18_ct_targetregion_EPS15	R	1	51592557	G	EPS15(ENSG00000085832)	ENSE00001388890
hg18_ct_targetregion_EPS15	R	1	51603504	A	EPS15(ENSG00000085832)
hg18_ct_targetregion_EPS15	R	1	51603527	G	EPS15(ENSG00000085832)
hg18_ct_targetregion_EPS15	M	1	51616805	C	EPS15(ENSG00000085832)
hg18_ct_targetregion_EPS15	W	1	51624501	T	EPS15(ENSG00000085832)
hg18_ct_targetregion_EPS15	K	1	51634982	T	EPS15(ENSG00000085832)
hg18_ct_targetregion_EPS15	T	1	51643729	G	EPS15(ENSG00000085832)
hg18_ct_targetregion_EPS15	M	1	51657540	C	EPS15(ENSG00000085832)
hg18_ct_targetregion_EPS15	R	1	51665252	G	EPS15(ENSG00000085832)
hg18_ct_targetregion_EPS15	T	1	51667903	G	EPS15(ENSG00000085832)
hg18_ct_targetregion_EPS15	R	1	51670930	G	EPS15(ENSG00000085832)
hg18_ct_targetregion_EPS15	Y	1	51675529	T	EPS15(ENSG00000085832)
hg18_ct_targetregion_EPS15	M	1	51686075	C	EPS15(ENSG00000085832)
hg18_ct_targetregion_EPS15	K	1	51689947	G	EPS15(ENSG00000085832)
hg18_ct_targetregion_EPS15	S	1	51709220	C	EPS15(ENSG00000085832)
hg18_ct_targetregion_EPS15	R	1	51709744	G	EPS15(ENSG00000085832)
hg18_ct_targetregion_EPS15	S	1	51754834	G	EPS15(ENSG00000085832)
hg18_ct_targetregion_SLC22A18	S	11	2873778	G
hg18_ct_targetregion_SLC22A18	R	11	2894930	G	SLC22A18(ENSG00000110628)
hg18_ct_targetregion_SLC22A18	S	11	2897894	C	SLC22A18(ENSG00000110628)
hg18_ct_targetregion_SLC22A18	T	11	2897900	G	SLC22A18(ENSG00000110628)
hg18_ct_targetregion_SLC22A18	R	11	2899855	G	SLC22A18(ENSG00000110628)
hg18_ct_targetregion_BCR	S	22	21876889	C	BCR(ENSG00000186716)
hg18_ct_targetregion_BCR	Y	22	21889994	C	BCR(ENSG00000186716)
hg18_ct_targetregion_BCR	A	22	21934295	G	BCR(ENSG00000186716)
hg18_ct_targetregion_BCR	M	22	21940370	C	BCR(ENSG00000186716)
hg18_ct_targetregion_BCR	Y	22	21969846	T	BCR(ENSG00000186716)
hg18_ct_targetregion_BCR	M	22	21991823	A
hg18_ct_targetregion_MTL5	R	11	68233132	G	MTL5(ENSG00000132749)
hg18_ct_targetregion_MTL5	K	11	68258668	T	MTL5(ENSG00000132749)
hg18_ct_targetregion_MTL5	S	11	68275702	G
hg18_ct_targetregion_P2RX7	Y	12	120060308	C	P2RX7(ENSG00000089041)
hg18_ct_targetregion_P2RX7	M	12	120079435	C	P2RX7(ENSG00000089041)
hg18_ct_targetregion_P2RX7	K	12	120099060	G	P2RX7(ENSG00000089041)
hg18_ct_targetregion_KIAA1804	T	1	231537345	A	MAP3K19(ENSG00000143674)
hg18_ct_targetregion_KIAA1804	R	1	231556357	G	MAP3K19(ENSG00000143674)
hg18_ct_targetregion_KIAA1804	Y	1	231561539	T	MAP3K19(ENSG00000143674)
hg18_ct_targetregion_SLC12A7	Y	5	1110571	C	SLC12A7(ENSG00000113504)
hg18_ct_targetregion_SLC12A7	K	5	1112977	T	SLC12A7(ENSG00000113504)
hg18_ct_targetregion_SLC12A7	Y	5	1116219	C	SLC12A7(ENSG00000113504)
hg18_ct_targetregion_SLC12A7	S	5	1130181	G	SLC12A7(ENSG00000113504)
hg18_ct_targetregion_SLC12A7	Y	5	1146340	C	SLC12A7(ENSG00000113504)
hg18_ct_targetregion_SLC12A7	R	5	1150367	G	SLC12A7(ENSG00000113504)
hg18_ct_targetregion_SLC12A7	Y	5	1150438	T	SLC12A7(ENSG00000113504)
hg18_ct_targetregion_SLC12A7	S	5	1150654	C	SLC12A7(ENSG00000113504)
hg18_ct_targetregion_SLC12A7	R	5	1151199	G	SLC12A7(ENSG00000113504)
hg18_ct_targetregion_SLC12A7	M	5	1152688	C	SLC12A7(ENSG00000113504)
hg18_ct_targetregion_SLC12A7	Y	5	1153337	C	SLC12A7(ENSG00000113504)
hg18_ct_targetregion_SLC12A7	R	5	1153545	G	SLC12A7(ENSG00000113504)
hg18_ct_targetregion_SLC12A7	R	5	1154817	G	SLC12A7(ENSG00000113504)
hg18_ct_targetregion_SLC12A7	Y	5	1156376	C	SLC12A7(ENSG00000113504)
hg18_ct_targetregion_SLC12A7	Y	5	1157591	T	SLC12A7(ENSG00000113504)
hg18_ct_targetregion_SLC12A7	R	5	1158971	G	SLC12A7(ENSG00000113504)
hg18_ct_targetregion_SLC12A7	Y	5	1159217	T	SLC12A7(ENSG00000113504)
hg18_ct_targetregion_SLC12A7	Y	5	1160346	C	SLC12A7(ENSG00000113504)
hg18_ct_targetregion_SLC12A7	A	5	1165994	C
hg18_ct_targetregion_SLC12A7	K	5	1166069	G
hg18_ct_targetregion_C22orf8	S	22	44112553	C	FAM118A(ENSG00000100376)
hg18_ct_targetregion_C22orf8	Y	22	44121176	C	SMC1B(ENSG00000077935)
hg18_ct_targetregion_ATP10A	M	15	23472549	C
hg18_ct_targetregion_ATP10A	M	15	23473355	A
hg18_ct_targetregion_ATP10A	R	15	23506163	A	ATP10A(ENSG00000206190)
hg18_ct_targetregion_ATP10A	R	15	23509454	G	ATP10A(ENSG00000206190)
hg18_ct_targetregion_ATP10A	Y	15	23595575	C	ATP10A(ENSG00000206190)
hg18_ct_targetregion_IRAK1	Y	X	152942347	T	MECP2(ENSG00000169057)	ENSE00001451349;ENSE00001252086
hg18_ct_targetregion_TMEM8	M	16	362827	C	TMEM8(ENSG00000129925)
hg18_ct_targetregion_TMEM8	R	16	366100	G	TMEM8(ENSG00000129925)
hg18_ct_targetregion_THUMPD3	A	3	9403103	G
hg18_ct_targetregion_IFI44L	W	1	78882505	T
hg18_ct_targetregion_LIP8	S	17	7772588	G	KCNAB3(ENSG00000170049)
hg18_ct_targetregion_LIP8	R	17	7774314	G
hg18_ct_targetregion_LIP8	K	17	7775277	T	TRAPPC1(ENSG00000170043)
hg18_ct_targetregion_LIP8	S	17	7775432	C	TRAPPC1(ENSG00000170043)
hg18_ct_targetregion_LIP8	R	17	7776498	G	CNTROB(ENSG00000170037)	ENSE00001524690;ENSE00001547059
hg18_ct_targetregion_LIP8	Y	17	7785364	C	CNTROB(ENSG00000170037)
hg18_ct_targetregion_LIP8	W	17	7787561	A	CNTROB(ENSG00000170037)	ENSE00001144879
hg18_ct_targetregion_LIP8	R	17	7795683	G
hg18_ct_targetregion_LIP8	R	17	7796962	G
hg18_ct_targetregion_LIP8	R	17	7797164	G
hg18_ct_targetregion_ATP6V1C2	Y	2	10833861	C	ATP6V1C2(ENSG00000143882)
hg18_ct_targetregion_ATP6V1C2	W	2	10833883	T	ATP6V1C2(ENSG00000143882)
hg18_ct_targetregion_ATP6V1C2	R	2	10835914	G	ATP6V1C2(ENSG00000143882)
hg18_ct_targetregion_ATP6V1C2	G	2	10837289	A	ATP6V1C2(ENSG00000143882)
hg18_ct_targetregion_DPM2	S	9	129733011	C
hg18_ct_targetregion_NID2	G	14	51582808	A	NID2(ENSG00000087303)
hg18_ct_targetregion_SLC15A2	R	3	123111803	G	SLC15A2(ENSG00000163406)
hg18_ct_targetregion_SLC15A2	W	3	123114155	A	SLC15A2(ENSG00000163406)
hg18_ct_targetregion_LLGL2	Y	17	71057019	C	LLGL2(ENSG00000073350)
hg18_ct_targetregion_LLGL2	Y	17	71086700	T
hg18_ct_targetregion_MGC33648	W	5	56241008	A	C5orf35(ENSG00000155542)	ENSE00001228265
hg18_ct_targetregion_ITIH4	S	3	52839978	C
hg18_ct_targetregion_TRAP1	R	16	3651387	G	TRAP1(ENSG00000126602)
hg18_ct_targetregion_TRAP1	K	16	3666376	G	TRAP1(ENSG00000126602)
hg18_ct_targetregion_TRAP1	Y	16	3683242	T	TRAP1(ENSG00000126602)
hg18_ct_targetregion_FANCA	Y	16	88340083	C	FANCA(ENSG00000187741)
hg18_ct_targetregion_GBP3	R	1	89246997	A	GBP3(ENSG00000117226)
hg18_ct_targetregion_TNXB	Y	6	32148778	T	TNXB(ENSG00000168477)
hg18_ct_targetregion_PECAM1	Y	17	59793376	C	PECAM1(ENSG00000198802)
hg18_ct_targetregion_PECAM1	Y	17	59808124	T
NA11993 Nimblegen
hg18_ct_targetregion_ST3GAL3	R	1	43944758	G
hg18_ct_targetregion_ST3GAL3	R	1	43970521	G	ST3GAL3(ENSG00000126091)
hg18_ct_targetregion_ST3GAL3	M	1	43972168	C	ST3GAL3(ENSG00000126091)
hg18_ct_targetregion_ST3GAL3	W	1	43982913	A	ST3GAL3(ENSG00000126091)
hg18_ct_targetregion_ST3GAL3	R	1	43992576	G	ST3GAL3(ENSG00000126091)
hg18_ct_targetregion_ST3GAL3	Y	1	44004044	C	ST3GAL3(ENSG00000126091)
hg18_ct_targetregion_ST3GAL3	R	1	44017748	A	ST3GAL3(ENSG00000126091)
hg18_ct_targetregion_ST3GAL3	M	1	44019642	C	ST3GAL3(ENSG00000126091)
hg18_ct_targetregion_ST3GAL3	M	1	44022000	A	ST3GAL3(ENSG00000126091)
hg18_ct_targetregion_ST3GAL3	S	1	44031272	C	ST3GAL3(ENSG00000126091)
hg18_ct_targetregion_ST3GAL3	Y	1	44031952	C	ST3GAL3(ENSG00000126091)
hg18_ct_targetregion_ST3GAL3	K	1	44061319	G	ST3GAL3(ENSG00000126091)
hg18_ct_targetregion_ST3GAL3	S	1	44106864	G	ST3GAL3(ENSG00000126091)
hg18_ct_targetregion_ST3GAL3	M	1	44152190	A	ST3GAL3(ENSG00000126091)
hg18_ct_targetregion_ST3GAL3	M	1	44157029	C	ST3GAL3(ENSG00000126091)
hg18_ct_targetregion_ST3GAL3	Y	1	44173812	T	ARTN(ENSG00000117407)	ENSE00001457603
hg18_ct_targetregion_USP36	Y	17	74291151	T
hg18_ct_targetregion_USP36	R	17	74291561	G
hg18_ct_targetregion_USP36	M	17	74309119	A	USP36(ENSG00000055483)
hg18_ct_targetregion_USP36	R	17	74346613	G	USP36(ENSG00000055483)
hg18_ct_targetregion_USP36	M	17	74348631	A
hg18_ct_targetregion_CLTCL1	W	22	17586691	T	CLTCL1(ENSG00000070371)
hg18_ct_targetregion_CLTCL1	M	22	17595625	A	CLTCL1(ENSG00000070371)
hg18_ct_targetregion_CLTCL1	M	22	17597390	A	CLTCL1(ENSG00000070371)	ENSE00000596271
hg18_ct_targetregion_CLTCL1	T	22	17618085	A	CLTCL1(ENSG00000070371)
hg18_ct_targetregion_CLTCL1	R	22	17639784	G	CLTCL1(ENSG00000070371)
hg18_ct_targetregion_CLTCL1	W	22	17651098	T	CLTCL1(ENSG00000070371)
hg18_ct_targetregion_TRIM45	Y	1	117453655	C
hg18_ct_targetregion_TRIM45	R	1	117464691	G	TRIM45(ENSG00000134253)
hg18_ct_targetregion_TRIM45	Y	1	117468107	C
hg18_ct_targetregion_TRIM45	A	1	117470860	G
hg18_ct_targetregion_SLC9A3R2	S	16	2016932	C	SLC9A3R2(ENSG00000065054)	ENSE00000873722
hg18_ct_targetregion_SLC9A3R2	Y	16	2025725	C	SLC9A3R2(ENSG00000065054)
hg18_ct_targetregion_SLC9A3R2	C	16	2028418	T	SLC9A3R2(ENSG00000065054)	ENSE00000945916
hg18_ct_targetregion_EPS15	R	1	51592557	G	EPS15(ENSG00000085832)	ENSE00001388890
hg18_ct_targetregion_EPS15	R	1	51603527	G	EPS15(ENSG00000085832)
hg18_ct_targetregion_EPS15	M	1	51616805	C	EPS15(ENSG00000085832)
hg18_ct_targetregion_EPS15	K	1	51622276	T	EPS15(ENSG00000085832)
hg18_ct_targetregion_EPS15	S	1	51622337	G	EPS15(ENSG00000085832)
hg18_ct_targetregion_EPS15	Y	1	51623289	C	EPS15(ENSG00000085832)
hg18_ct_targetregion_EPS15	W	1	51624501	T	EPS15(ENSG00000085832)
hg18_ct_targetregion_EPS15	K	1	51634982	T	EPS15(ENSG00000085832)
hg18_ct_targetregion_EPS15	S	1	51652947	G	EPS15(ENSG00000085832)
hg18_ct_targetregion_EPS15	Y	1	51654476	C	EPS15(ENSG00000085832)
hg18_ct_targetregion_EPS15	M	1	51657540	C	EPS15(ENSG00000085832)
hg18_ct_targetregion_EPS15	K	1	51667131	G	EPS15(ENSG00000085832)
hg18_ct_targetregion_EPS15	K	1	51667903	G	EPS15(ENSG00000085832)
hg18_ct_targetregion_EPS15	Y	1	51675529	T	EPS15(ENSG00000085832)
hg18_ct_targetregion_EPS15	M	1	51682367	A	EPS15(ENSG00000085832)
hg18_ct_targetregion_EPS15	Y	1	51689085	T	EPS15(ENSG00000085832)
hg18_ct_targetregion_EPS15	R	1	51700190	A	EPS15(ENSG00000085832)
hg18_ct_targetregion_EPS15	R	1	51700646	A	EPS15(ENSG00000085832)
hg18_ct_targetregion_EPS15	W	1	51705913	A	EPS15(ENSG00000085832)
hg18_ct_targetregion_EPS15	S	1	51709220	C	EPS15(ENSG00000085832)
hg18_ct_targetregion_EPS15	R	1	51709744	G	EPS15(ENSG00000085832)
hg18_ct_targetregion_EPS15	R	1	51728934	G	EPS15(ENSG00000085832)
hg18_ct_targetregion_EPS15	R	1	51742072	A	EPS15(ENSG00000085832)
hg18_ct_targetregion_EPS15	W	1	51752635	T	EPS15(ENSG00000085832)
hg18_ct_targetregion_EPS15	S	1	51754834	G	EPS15(ENSG00000085832)
hg18_ct_targetregion_SLC22A18	S	11	2873778	G
hg18_ct_targetregion_SLC22A18	S	11	2882909	G	SLC22A18(ENSG00000110628)
hg18_ct_targetregion_SLC22A18	R	11	2883221	G	SLC22A18(ENSG00000110628)
hg18_ct_targetregion_SLC22A18	S	11	2887285	G	SLC22A18(ENSG00000110628)
hg18_ct_targetregion_SLC22A18	R	11	2894930	G	SLC22A18(ENSG00000110628)
hg18_ct_targetregion_SLC22A18	M	11	2897882	C	SLC22A18(ENSG00000110628)
hg18_ct_targetregion_SLC22A18	R	11	2899855	G	SLC22A18(ENSG00000110628)
hg18_ct_targetregion_BCR	S	22	21876889	C	BCR(ENSG00000186716)
hg18_ct_targetregion_BCR	Y	22	21889994	C	BCR(ENSG00000186716)
hg18_ct_targetregion_BCR	M	22	21940370	C	BCR(ENSG00000186716)
hg18_ct_targetregion_BCR	M	22	21949495	A	BCR(ENSG00000186716)
hg18_ct_targetregion_BCR	Y	22	21969846	T	BCR(ENSG00000186716)
hg18_ct_targetregion_MTL5	M	11	68246724	A	MTL5(ENSG00000132749)
hg18_ct_targetregion_MTL5	M	11	68257952	A	MTL5(ENSG00000132749)
hg18_ct_targetregion_MTL5	S	11	68275702	G
hg18_ct_targetregion_P2RX7	Y	12	120060308	C	P2RX7(ENSG00000089041)
hg18_ct_targetregion_P2RX7	M	12	120079435	C	P2RX7(ENSG00000089041)
hg18_ct_targetregion_P2RX7	K	12	120099060	G	P2RX7(ENSG00000089041)
hg18_ct_targetregion_KIAA1804	M	1	231542144	C	MAP3K19(ENSG00000143674)
hg18_ct_targetregion_KIAA1804	M	1	231545292	C	MAP3K19(ENSG00000143674)
hg18_ct_targetregion_KIAA1804	R	1	231556357	G	MAP3K19(ENSG00000143674)
hg18_ct_targetregion_CCDC15	C	11	124343956	A	CCDC15(ENSG00000149548)
hg18_ct_targetregion_CCDC15	K	11	124344203	G	CCDC15(ENSG00000149548)
hg18_ct_targetregion_MRPL18	R	6	160136875	G	MRPL18(ENSG00000112110)
hg18_ct_targetregion_SLC12A7	W	5	1098578	A
hg18_ct_targetregion_SLC12A7	Y	5	1099503	T
hg18_ct_targetregion_SLC12A7	G	5	1100750	A
hg18_ct_targetregion_SLC12A7	M	5	1108127	A	SLC12A7(ENSG00000113504)
hg18_ct_targetregion_SLC12A7	K	5	1112977	T	SLC12A7(ENSG00000113504)
hg18_ct_targetregion_SLC12A7	M	5	1113839	A	SLC12A7(ENSG00000113504)
hg18_ct_targetregion_SLC12A7	Y	5	1116219	C	SLC12A7(ENSG00000113504)
hg18_ct_targetregion_SLC12A7	C	5	1118308	T	SLC12A7(ENSG00000113504)
hg18_ct_targetregion_SLC12A7	C	5	1126614	A	SLC12A7(ENSG00000113504)
hg18_ct_targetregion_SLC12A7	Y	5	1146340	C	SLC12A7(ENSG00000113504)
hg18_ct_targetregion_SLC12A7	S	5	1148170	C	SLC12A7(ENSG00000113504)
hg18_ct_targetregion_SLC12A7	Y	5	1149373	C	SLC12A7(ENSG00000113504)
hg18_ct_targetregion_SLC12A7	A	5	1149959	G	SLC12A7(ENSG00000113504)
hg18_ct_targetregion_SLC12A7	R	5	1150367	G	SLC12A7(ENSG00000113504)
hg18_ct_targetregion_SLC12A7	S	5	1150654	C	SLC12A7(ENSG00000113504)
hg18_ct_targetregion_SLC12A7	R	5	1151199	G	SLC12A7(ENSG00000113504)
hg18_ct_targetregion_SLC12A7	A	5	1152688	C	SLC12A7(ENSG00000113504)
hg18_ct_targetregion_SLC12A7	Y	5	1153337	C	SLC12A7(ENSG00000113504)
hg18_ct_targetregion_SLC12A7	R	5	1153545	G	SLC12A7(ENSG00000113504)
hg18_ct_targetregion_SLC12A7	Y	5	1157591	T	SLC12A7(ENSG00000113504)
hg18_ct_targetregion_SLC12A7	A	5	1158971	G	SLC12A7(ENSG00000113504)
hg18_ct_targetregion_SLC12A7	Y	5	1159217	T	SLC12A7(ENSG00000113504)
hg18_ct_targetregion_SLC12A7	M	5	1165994	C
hg18_ct_targetregion_SLC12A7	K	5	1166069	G
hg18_ct_targetregion_FLVCR	M	1	211124550	C	FLVCR1(ENSG00000162769)
hg18_ct_targetregion_C22orf8	M	22	44080730	A
hg18_ct_targetregion_C22orf8	Y	22	44121176	C	SMC1B(ENSG00000077935)
hg18_ct_targetregion_ATP10A	M	15	23472549	C
hg18_ct_targetregion_ATP10A	M	15	23473355	A
hg18_ct_targetregion_ATP10A	R	15	23506163	A	ATP10A(ENSG00000206190)
hg18_ct_targetregion_ATP10A	A	15	23516915	C	ATP10A(ENSG00000206190)
hg18_ct_targetregion_ATP10A	C	15	23516916	A	ATP10A(ENSG00000206190)
hg18_ct_targetregion_ATP10A	Y	15	23595575	C	ATP10A(ENSG00000206190)
hg18_ct_targetregion_ATP10A	M	15	23613220	A	ATP10A(ENSG00000206190)
hg18_ct_targetregion_ATP10A	R	15	23630774	G	ATP10A(ENSG00000206190)
hg18_ct_targetregion_ATP10A	M	15	23640216	A	ATP10A(ENSG00000206190)
hg18_ct_targetregion_ATP10A	Y	15	23640872	C	ATP10A(ENSG00000206190)
hg18_ct_targetregion_IRAK1	Y	X	152942347	T	MECP2(ENSG00000169057)	ENSE00001451349;ENSE00001252086
hg18_ct_targetregion_ASCIZ	W	16	79624642	T
hg18_ct_targetregion_ASCIZ	W	16	79624643	A
hg18_ct_targetregion_SERPINF1	K	17	1614904	T	SERPINF1(ENSG00000132386)
hg18_ct_targetregion_SERPINF1	W	17	1614905	T	SERPINF1(ENSG00000132386)
hg18_ct_targetregion_SERPINF1	R	17	1631781	G	SMYD4(ENSG00000186532)
hg18_ct_targetregion_TMEM8	M	16	362827	C	TMEM8(ENSG00000129925)
hg18_ct_targetregion_TMEM8	R	16	366100	G	TMEM8(ENSG00000129925)
hg18_ct_targetregion_TMEM8	C	16	368517	T	TMEM8(ENSG00000129925)
hg18_ct_targetregion_TMEM8	C	16	376861	A	Z97634.3(ENSG00000216963)	ENSE00001557985
hg18_ct_targetregion_THUMPD3	Y	3	9375328	T
hg18_ct_targetregion_THUMPD3	M	3	9405213	A
hg18_ct_targetregion_IFI44L	M	1	78882362	C
hg18_ct_targetregion_IFI44L	A	1	78882505	T
hg18_ct_targetregion_LIP8	A	17	7774314	G
hg18_ct_targetregion_LIP8	K	17	7775277	T	TRAPPC1(ENSG00000170043)
hg18_ct_targetregion_LIP8	S	17	7775432	C	TRAPPC1(ENSG00000170043)
hg18_ct_targetregion_LIP8	R	17	7776498	G	CNTROB(ENSG00000170037)	ENSE00001524690;ENSE00001547059
hg18_ct_targetregion_LIP8	W	17	7787561	A	CNTROB(ENSG00000170037)	ENSE00001144879
hg18_ct_targetregion_LIP8	R	17	7796962	G
hg18_ct_targetregion_LIP8	R	17	7797164	G
hg18_ct_targetregion_ATP6V1C2	M	2	10817446	A	ATP6V1C2(ENSG00000143882)
hg18_ct_targetregion_ATP6V1C2	M	2	10824001	A	ATP6V1C2(ENSG00000143882)
hg18_ct_targetregion_ATP6V1C2	R	2	10835914	G	ATP6V1C2(ENSG00000143882)
hg18_ct_targetregion_ATP6V1C2	M	2	10846497	A	PDIA6(ENSG00000143870)	ENSE00000962418
hg18_ct_targetregion_DPM2	Y	9	129732388	C	PIP5KL1(ENSG00000167103)
hg18_ct_targetregion_DPM2	S	9	129733011	C
hg18_ct_targetregion_DPM2	M	9	129734198	C
hg18_ct_targetregion_DPM2	M	9	129744281	A	FAM102A(ENSG00000167106)	ENSE00001180911;ENSE00001367457;ENSE00001459474
hg18_ct_targetregion_NID2	K	14	51581087	G	NID2(ENSG00000087303)
hg18_ct_targetregion_NID2	R	14	51607415	G
hg18_ct_targetregion_NID2	C	14	51608851	A
hg18_ct_targetregion_NID2	C	14	51608854	A
hg18_ct_targetregion_SPATA20	Y	17	45977263	T
hg18_ct_targetregion_SPATA20	Y	17	45977264	C
hg18_ct_targetregion_SPATA20	C	17	45981181	A	SPATA20(ENSG00000006282)	ENSE00000737229
hg18_ct_targetregion_SLC15A2	W	3	123114155	A	SLC15A2(ENSG00000163406)
hg18_ct_targetregion_LLGL2	M	17	71042917	A	LLGL2(ENSG00000073350)
hg18_ct_targetregion_LLGL2	Y	17	71055944	T	LLGL2(ENSG00000073350)
hg18_ct_targetregion_LLGL2	Y	17	71057019	C	LLGL2(ENSG00000073350)
hg18_ct_targetregion_LLGL2	Y	17	71086700	T
hg18_ct_targetregion_MGC33648	W	5	56241008	A	C5orf35(ENSG00000155542)	ENSE00001228265
hg18_ct_targetregion_ITIH4	S	3	52839978	C
hg18_ct_targetregion_CPNE1	Y	20	33686457	C	CPNE1(ENSG00000214078)
hg18_ct_targetregion_TRAP1	R	16	3651387	G	TRAP1(ENSG00000126602)
hg18_ct_targetregion_TRAP1	K	16	3682611	T	TRAP1(ENSG00000126602)
hg18_ct_targetregion_TRAP1	R	16	3687097	G	TRAP1(ENSG00000126602)
hg18_ct_targetregion_FANCA	Y	16	88340083	C	FANCA(ENSG00000187741)
hg18_ct_targetregion_FANCA	Y	16	88352052	C	FANCA(ENSG00000187741)
hg18_ct_targetregion_FANCA	K	16	88410308	G	FANCA(ENSG00000187741)
hg18_ct_targetregion_GBP3	R	1	89246997	A	GBP3(ENSG00000117226)
hg18_ct_targetregion_GBP3	M	1	89262948	A
hg18_ct_targetregion_GBP3	C	1	89264575	A
hg18_ct_targetregion_TNXB	R	6	32114171	G	AL645922.11-2(ENSG00000204338);TNXB(ENSG00000168477);CYP21A2(ENSG00000198457)	ENSE00001496116
hg18_ct_targetregion_TNXB	R	6	32116978	G	TNXB(ENSG00000168477);CYP21A2(ENSG00000198457)	ENSE00001465949;ENSE00001466333
hg18_ct_targetregion_TNXB	Y	6	32148778	T	TNXB(ENSG00000168477)
hg18_ct_targetregion_TNXB	M	6	32166649	A	TNXB(ENSG00000168477)
hg18_ct_targetregion_TNXB	M	6	32185330	C
hg18_ct_targetregion_PECAM1	M	17	59780144	A	PECAM1(ENSG00000198802)
hg18_ct_targetregion_PECAM1	Y	17	59793376	C	PECAM1(ENSG00000198802)
hg18_ct_targetregion_PECAM1	Y	17	59808124	T
